# Supplementary material for: Profiling ascidian promoters as the primordial type of vertebrate promoter
Source: PubMed Central journal article supplement (PMC3333190; doi:10.1186/1471-2164-12-s3-s7), 2011-11-30
Supplement: 1471-2164-12-S3-S7-S1.pdf [file 1471-2164-12-S3-S7-S1.pdf]

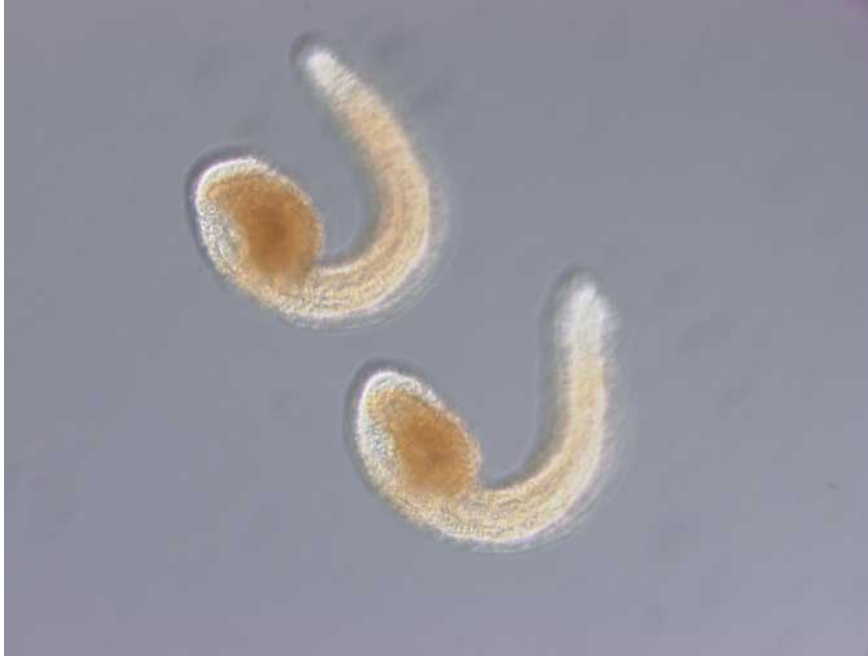

Fig. S1. *Ciona intestinalis* embryos at mid-tailbud stage.  
This picture was taken 12 hours after fertilization.
