# Supplementary material for: Profiling ascidian promoters as the primordial type of vertebrate promoter
Source: PubMed Central journal article supplement (PMC3333190; doi:10.1186/1471-2164-12-s3-s7), 2011-11-30
Supplement: 1471-2164-12-S3-S7-S3.pdf [file 1471-2164-12-S3-S7-S3.pdf]

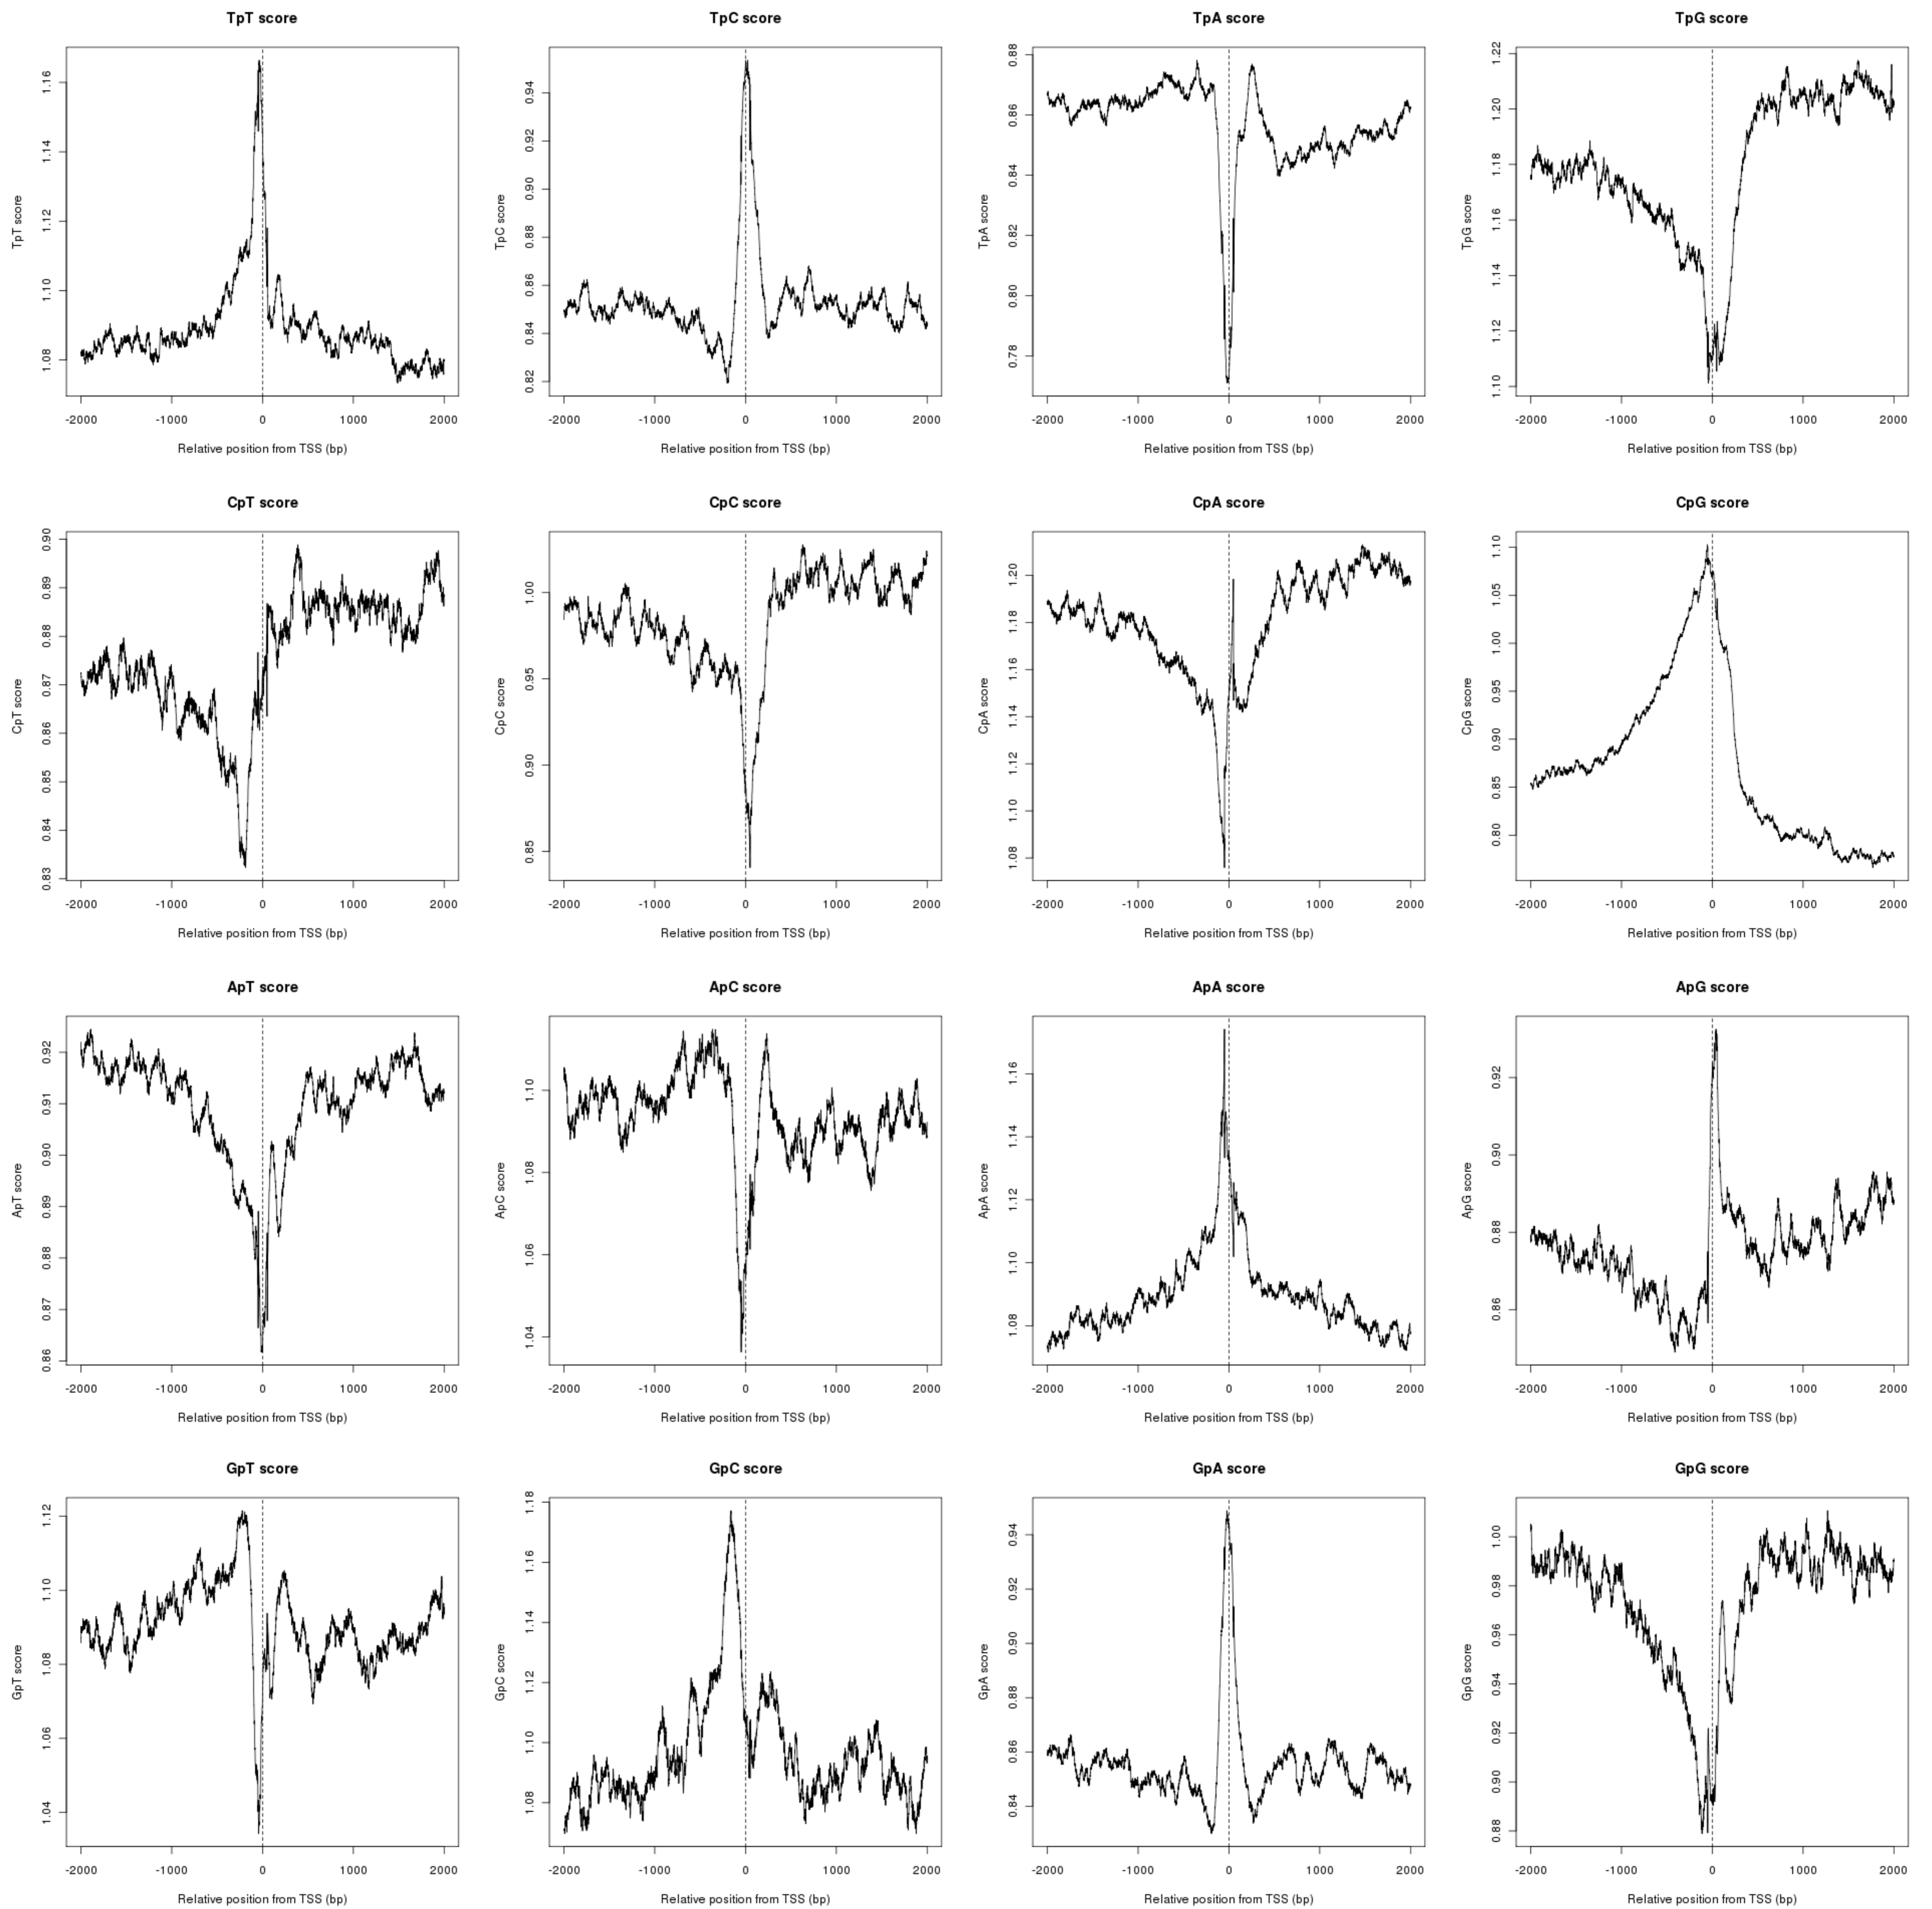

Fig. S2A. Changes in dinucleotide scores in the vicinity of TSSs (ascidian promoters). Note that the vertical scales vary in each panel.

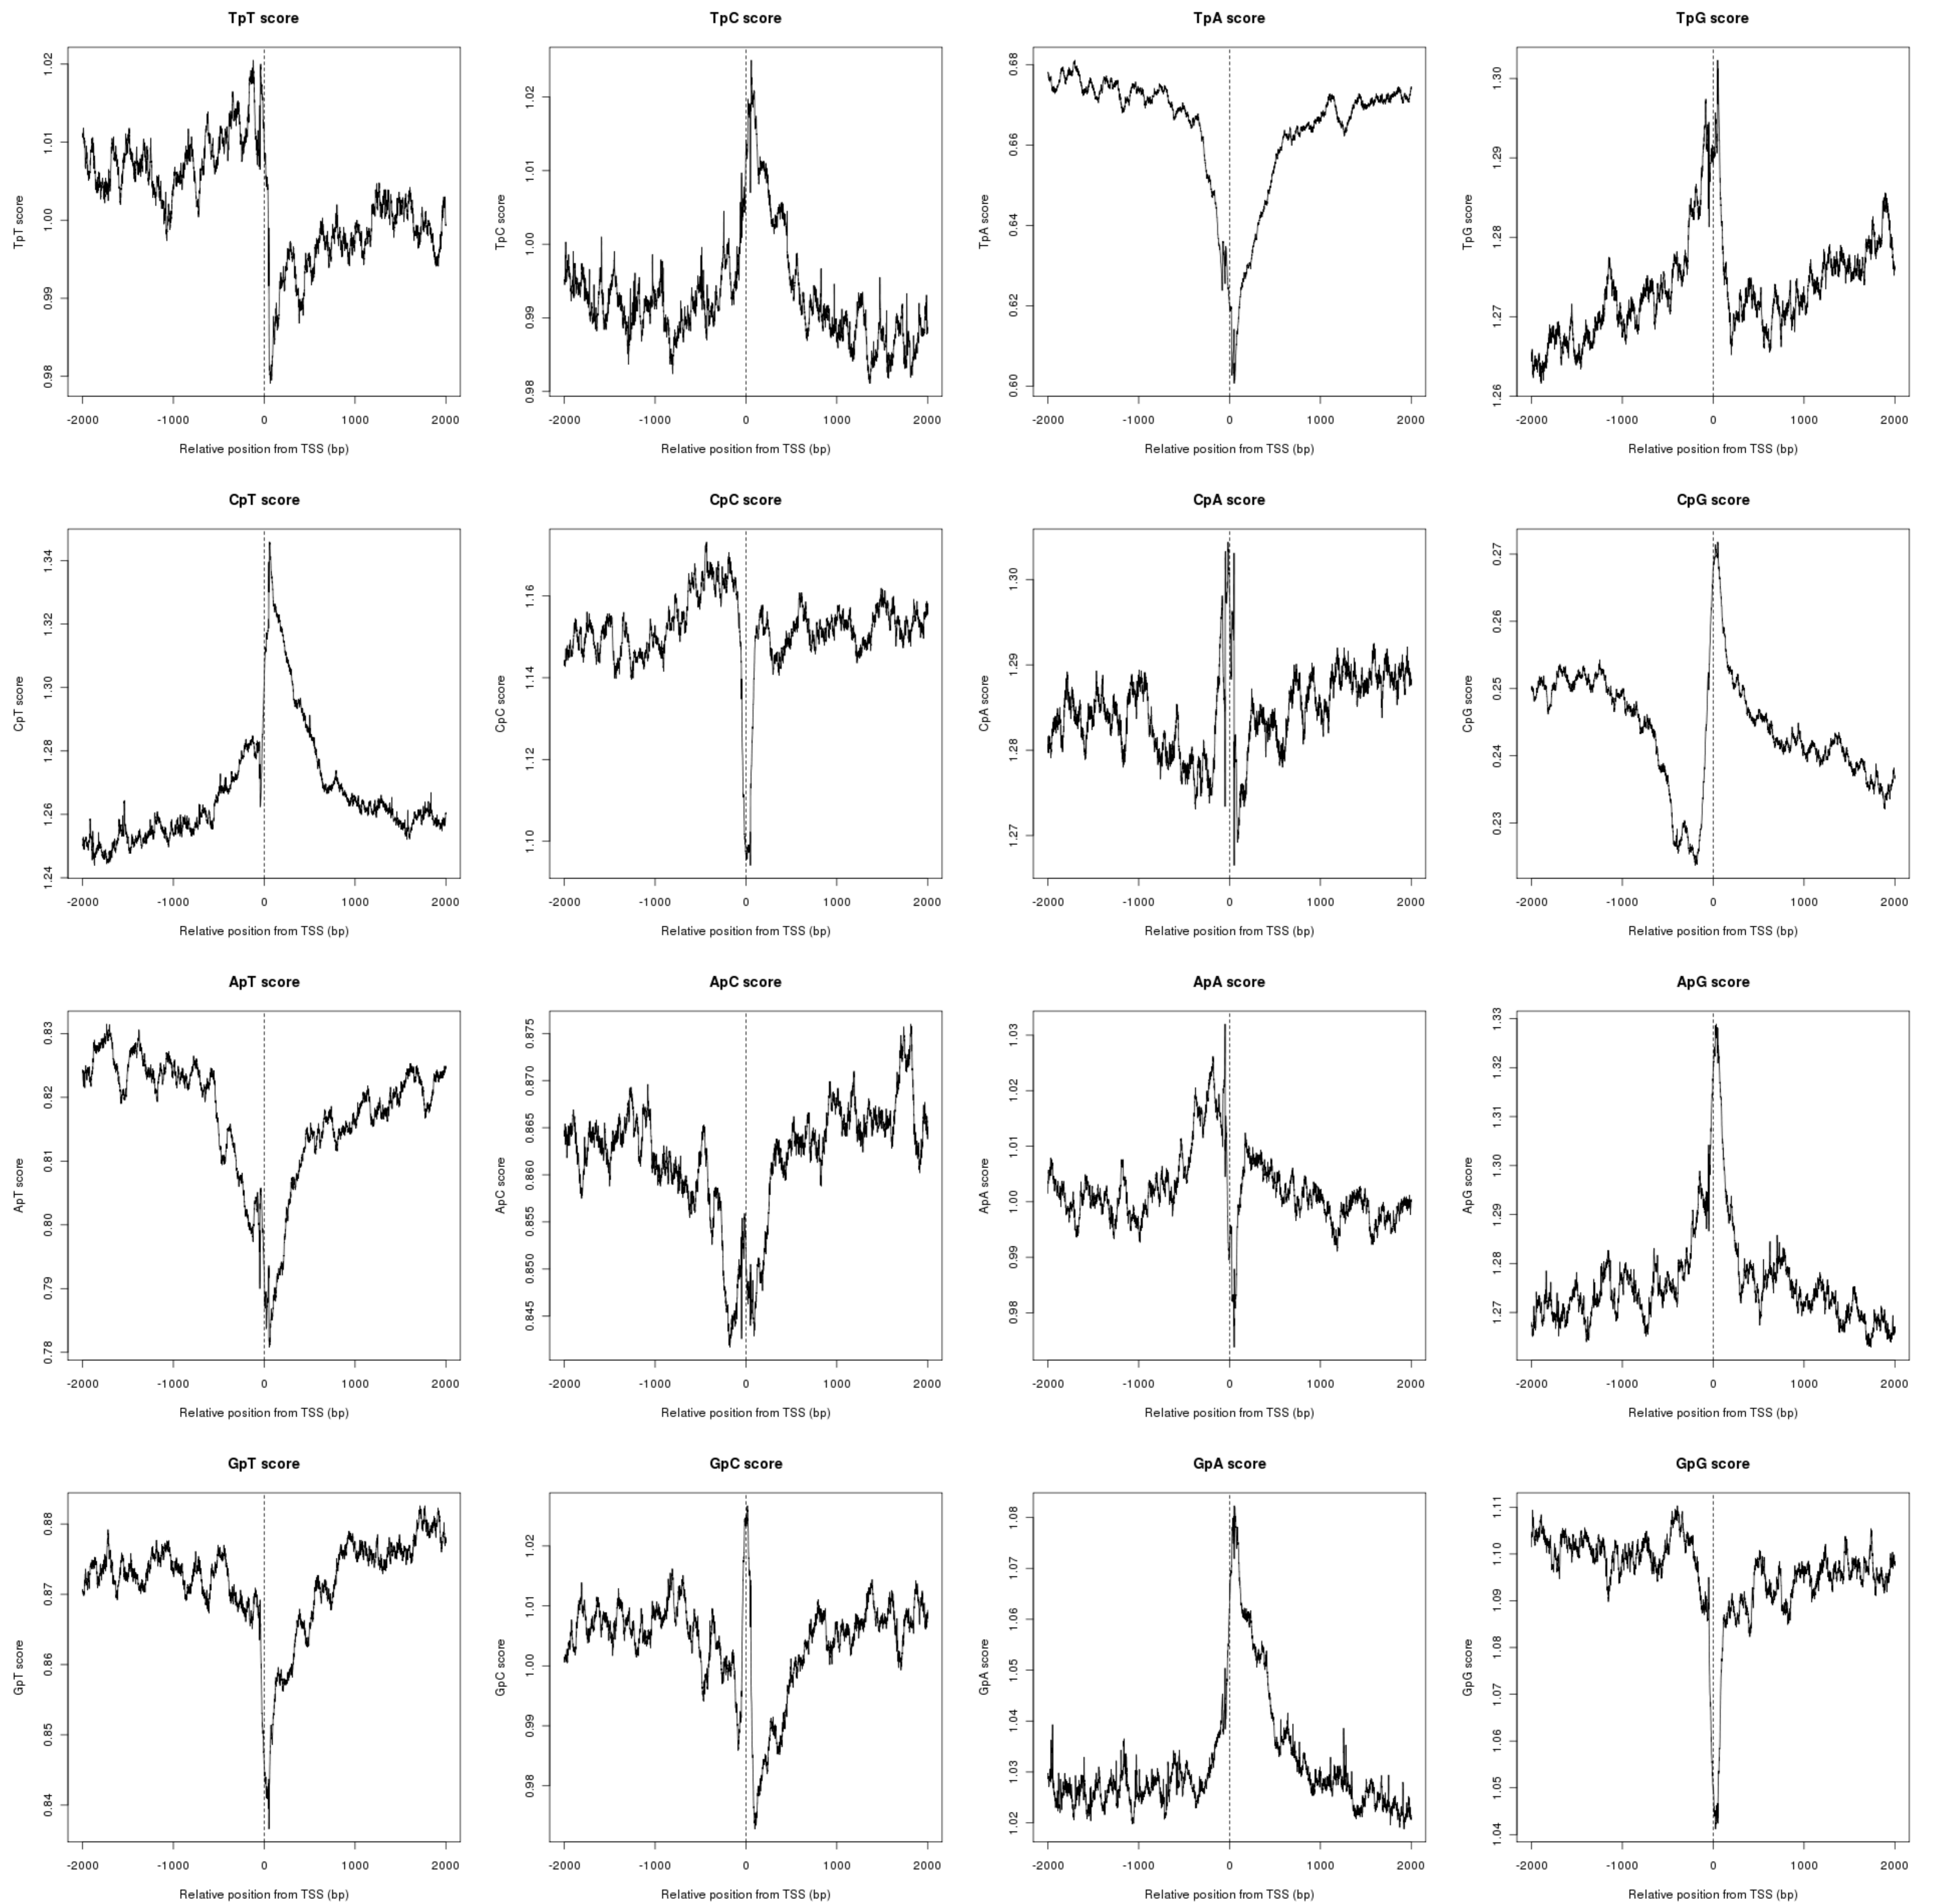

Fig. S2B. Changes in dinucleotide scores in the vicinity of TSSs (human CpG-poor promoters) . Note that the vertical scales vary in each panel.

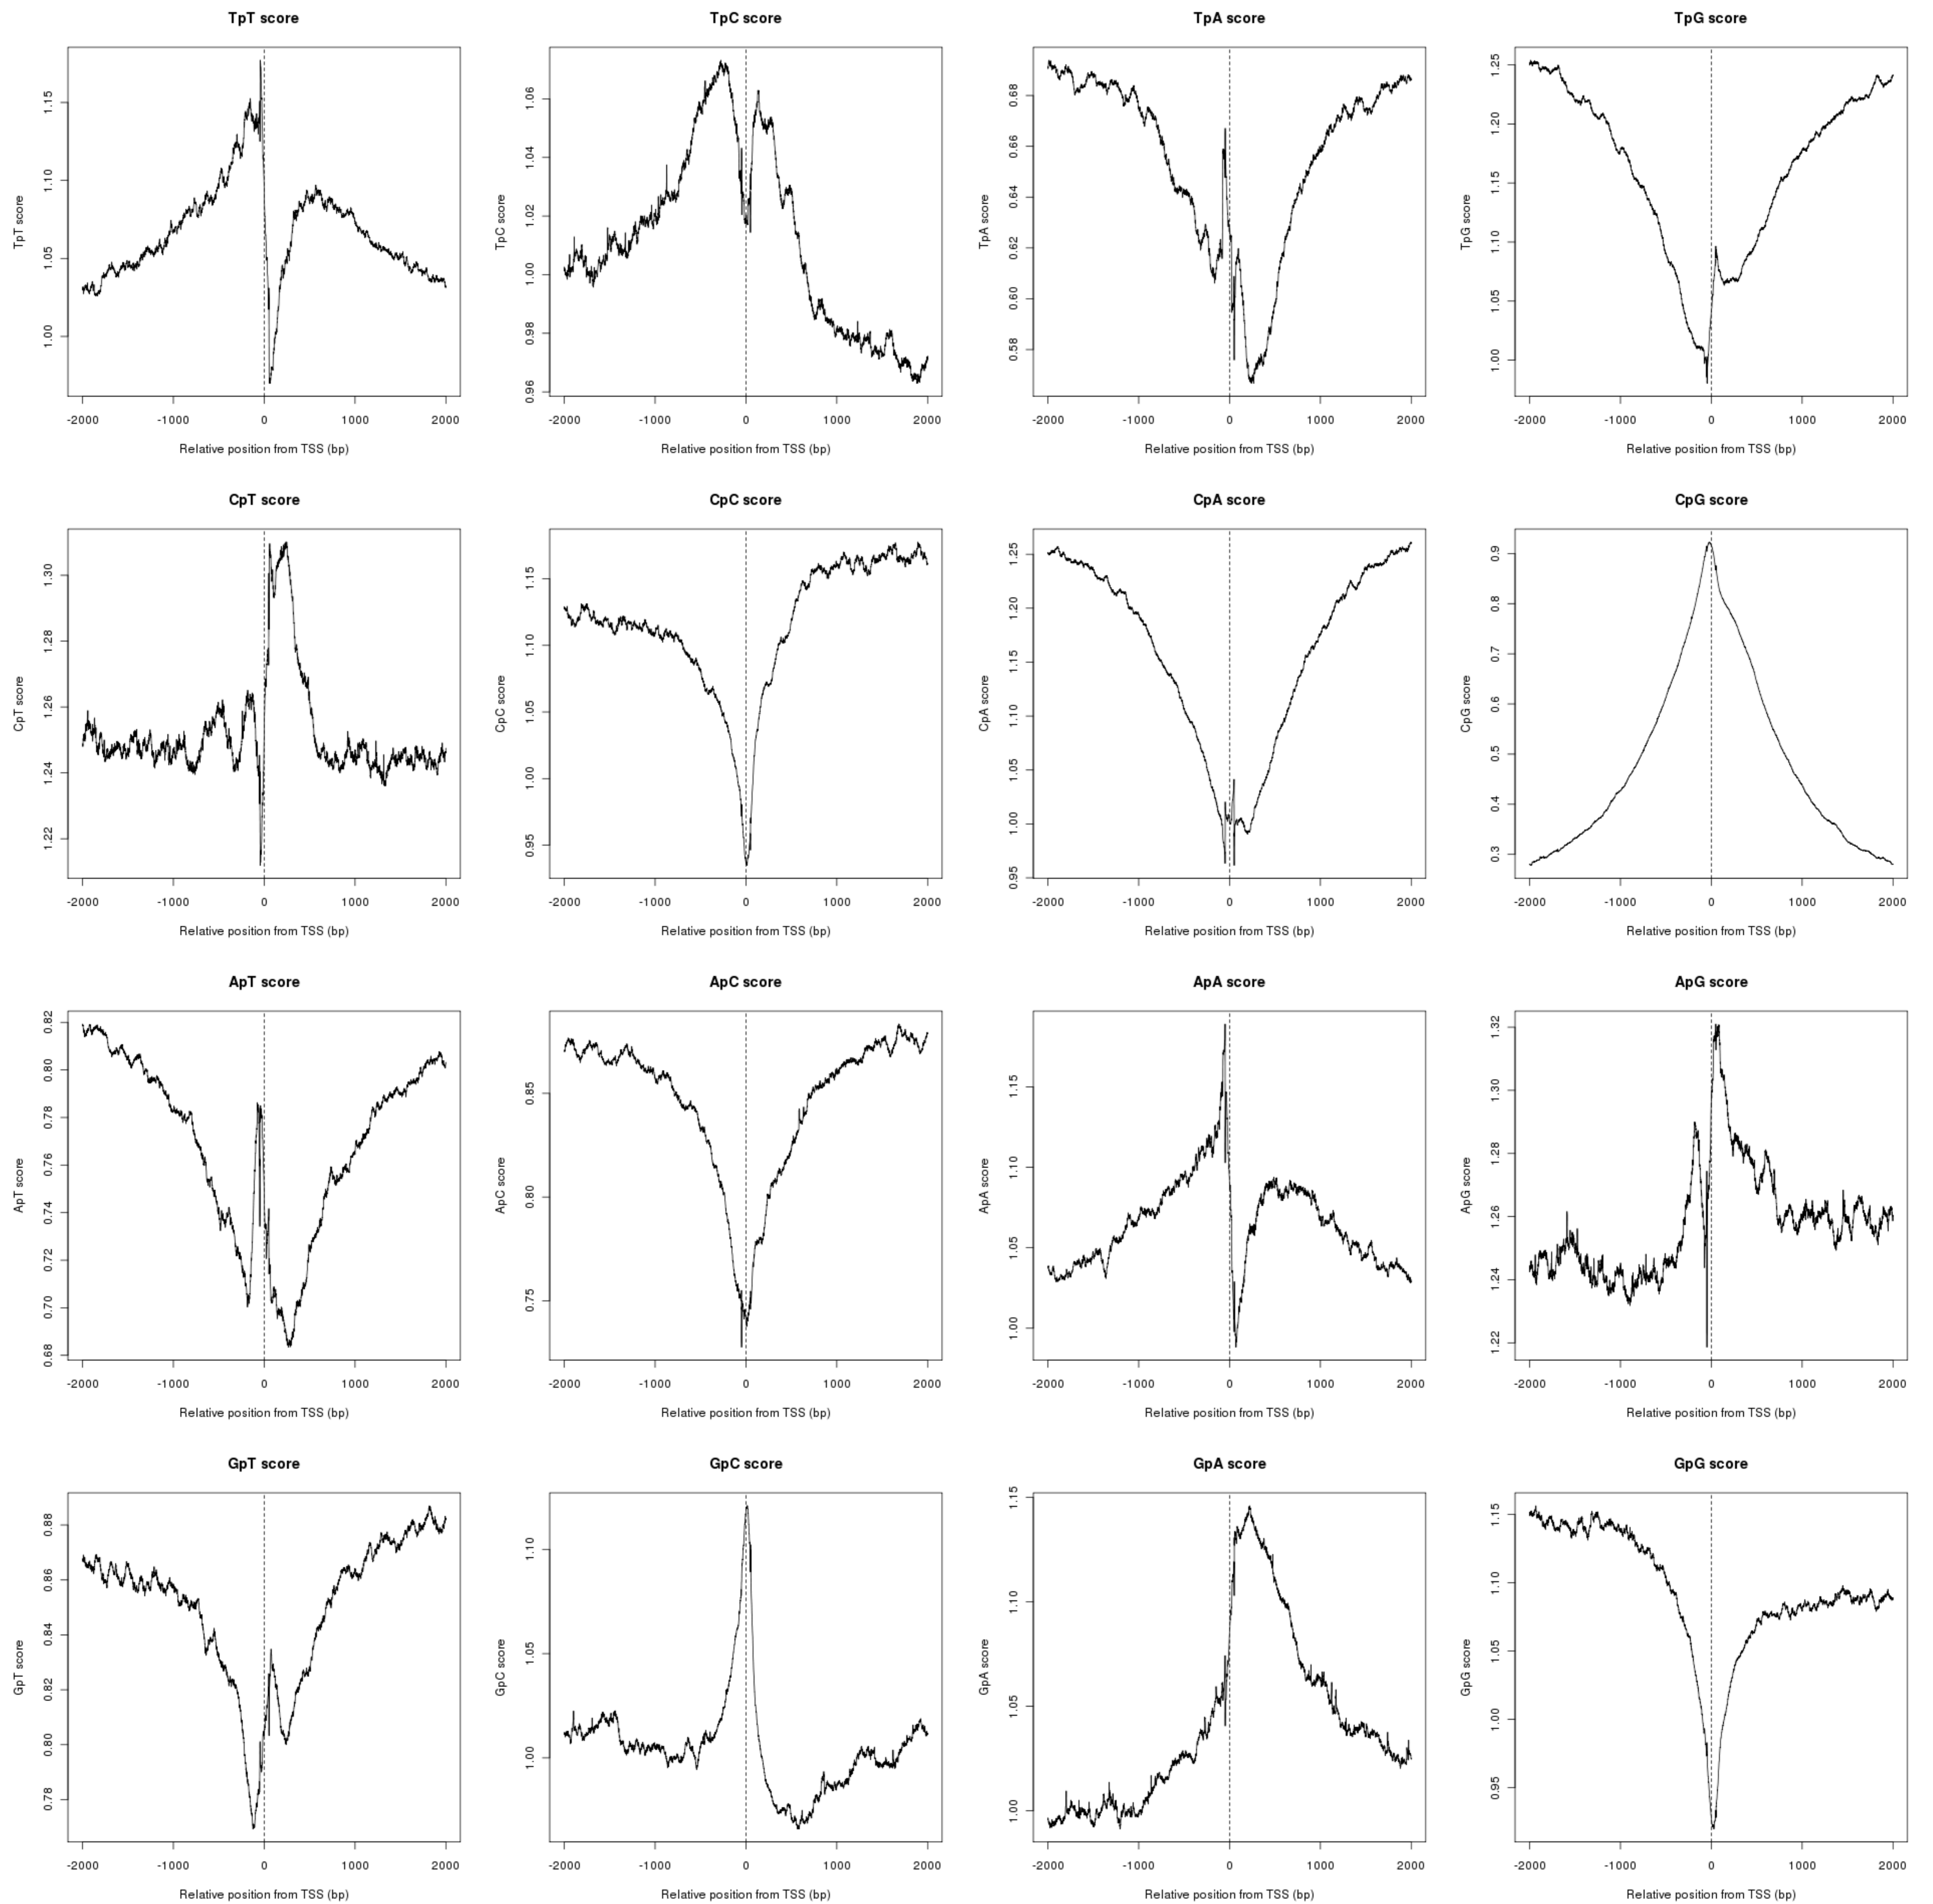

Fig. S2C. Changes in dinucleotide scores in the vicinity of TSSs (human CpG-rich promoters) . Note that the vertical scales vary in each panel.
